# Supplementary material for: A DNA Methylation-Based Gene Signature Can Predict Triple-Negative Breast Cancer Diagnosis
Source: MDPI journal article supplement (doi:10.3390/biomedicines9101394), 2021-10-04
Supplement: s1 [file s1]

**Table S1.** Pathological and clinical characteristics of TNBC patients from the FFPE cohort used for validation ( $n = 51$ ).

| Feature                                   | Frequency (%)     |
|-------------------------------------------|-------------------|
| <b>Age (years)</b>                        |                   |
| Mean (range)                              | 59.26 (31–81)     |
| <b>Tumour size (cm)</b>                   |                   |
| Mean (range)                              | 2.2 (0.3–10.0)    |
| <b>Lymph node involvement</b>             |                   |
| No                                        | 29/51 (57.0)      |
| Yes                                       | 21/51 (41.0)      |
| n.a.                                      | 1/51 (2.0)        |
| <b>Stage</b>                              |                   |
| I                                         | 11/51 (21.0)      |
| IIA                                       | 22/51 (43.0)      |
| IIB                                       | 6/51 (12.0)       |
| IIIA                                      | 8/51 (16.0)       |
| IIIC                                      | 3/51 (6.0)        |
| n.a.                                      | 1/51 (2.0)        |
| <b>Progression-free survival (months)</b> |                   |
| Mean (range)                              | 81.7 (10.3–216.9) |
| <b>Progression</b>                        |                   |
| No                                        | 34/51 (66.6)      |
| Yes                                       | 16/51 (31.4)      |
| n.a.                                      | 1/51 (2.0)        |
| <b>Overall survival (months)</b>          |                   |
| Mean (range)                              | 89 (10.3–216.9)   |
| <b>Outcome</b>                            |                   |
| Exitus                                    | 15/51 (29.0)      |
| n.a.                                      | 1/51 (2.0)        |
| <b>Chemotherapy</b>                       |                   |
| No                                        | 8/51 (16.0)       |
| Yes                                       | 41/51 (80.0)      |
| n.a.                                      | 2/51 (4.0)        |
| <b>Radiotherapy</b>                       |                   |
| No                                        | 11/51 (21.0)      |
| Yes                                       | 38/51 (74.0)      |
| n.a.                                      | 2/51 (4.0)        |

n.a.: non-available data.

**Table S2.** Description of the 35 differentially methylated probes with predictive value of TNBC diagnosis. Each  $\Delta\beta$  value was calculated by subtracting the mean  $\beta$  value of TNBC (TN) samples minus the mean  $\beta$  value of samples from non-neoplastic breast samples (N), patients with other BC subtypes (BC), or each of them: Luminal A (LA), Luminal B/HER2 negative (LB), Luminal B/HER2 positive (TN) and HER2 (H). Probes are sorted by the  $\Delta\beta$  in TNBC minus  $\Delta\beta$  in N.

| Probe Name | Gene Name       | $\Delta\beta$ (TN-N) | $\Delta\beta$ (TN-BC) | $\Delta\beta$ (TN-LA) | $\Delta\beta$ (TN-LB) | $\Delta\beta$ (TN-LH) | $\Delta\beta$ (TN-H) |
|------------|-----------------|----------------------|-----------------------|-----------------------|-----------------------|-----------------------|----------------------|
| cg15928106 | <i>FLJ43663</i> | -0.39                | -0.38                 | -0.42                 | -0.46                 | -0.39                 | -0.24                |
| cg05908105 | <i>NET1</i>     | -0.37                | -0.07                 | -0.08                 | -0.02                 | 0.00                  | -0.17                |
| cg26026748 | <i>PBX1</i>     | -0.35                | -0.05                 | -0.03                 | -0.10                 | -0.02                 | -0.04                |
| cg16476991 | <i>RASA3</i>    | -0.34                | -0.19                 | -0.20                 | -0.15                 | -0.22                 | -0.19                |
| cg25766247 |                 | -0.32                | 0.00                  | -0.02                 | 0.03                  | 0.01                  | -0.03                |
| cg05468843 | <i>IL10RA</i>   | -0.30                | -0.41                 | -0.38                 | -0.44                 | -0.44                 | -0.38                |

|            |                 |       |       |       |       |       |       |
|------------|-----------------|-------|-------|-------|-------|-------|-------|
| cg09323975 |                 | -0.25 | -0.14 | -0.13 | -0.15 | -0.11 | -0.15 |
| cg07756483 | <i>KCNN4</i>    | -0.22 | -0.32 | -0.34 | -0.36 | -0.40 | -0.17 |
| cg00585901 | <i>EFNA4</i>    | -0.17 | -0.20 | -0.21 | -0.19 | -0.25 | -0.14 |
| cg03471047 |                 | -0.14 | -0.04 | -0.01 | 0.01  | -0.05 | -0.09 |
| cg25252598 |                 | -0.14 | -0.09 | -0.13 | 0.00  | -0.16 | -0.07 |
| cg01794555 | <i>LCP1</i>     | -0.13 | -0.07 | -0.06 | -0.13 | -0.08 | -0.03 |
| cg17662182 |                 | -0.09 | -0.02 | -0.01 | -0.01 | -0.01 | -0.06 |
| cg07245635 | <i>S100A4</i>   | 0.12  | -0.03 | -0.04 | -0.03 | -0.02 | -0.02 |
| cg00534684 | <i>PTAFR</i>    | 0.13  | 0.01  | 0.01  | 0.00  | 0.01  | 0.01  |
| cg00913879 | <i>DNAH17</i>   | 0.13  | -0.04 | -0.06 | -0.05 | -0.05 | -0.01 |
| cg14379490 | <i>FAM120A</i>  | 0.14  | 0.02  | 0.01  | 0.01  | 0.03  | 0.05  |
| cg05242402 | <i>MICALL2</i>  | 0.16  | 0.03  | 0.03  | 0.02  | 0.01  | 0.06  |
| cg04091078 | <i>SLCO1C1</i>  | 0.17  | 0.04  | 0.03  | 0.09  | 0.03  | 0.02  |
| cg18397308 | <i>C19orf50</i> | 0.17  | 0.00  | 0.00  | -0.01 | 0.00  | 0.02  |
| cg22239325 | <i>MBP</i>      | 0.17  | 0.07  | 0.02  | 0.09  | 0.15  | 0.05  |
| cg07452625 | <i>SPG7</i>     | 0.17  | 0.00  | 0.00  | -0.04 | -0.01 | 0.04  |
| cg25590335 | <i>PKN1</i>     | 0.18  | 0.00  | 0.00  | -0.02 | 0.01  | 0.01  |
| cg17082405 | <i>PLEC1</i>    | 0.18  | 0.00  | -0.01 | -0.01 | -0.01 | 0.04  |
| cg13521205 | <i>FAM129B</i>  | 0.19  | -0.02 | -0.03 | -0.05 | -0.04 | 0.03  |
| cg15331383 | <i>RPTOR</i>    | 0.20  | -0.03 | -0.01 | -0.07 | -0.05 | 0.01  |
| cg27478167 | <i>HEATR2</i>   | 0.20  | -0.01 | -0.01 | -0.05 | -0.02 | 0.02  |
| cg25588480 | <i>MINK1</i>    | 0.20  | 0.01  | 0.01  | 0.00  | 0.00  | 0.04  |
| cg00139947 | <i>TOP1MT</i>   | 0.20  | 0.02  | 0.02  | -0.01 | 0.00  | 0.05  |
| cg03630790 | <i>TGFBR2</i>   | 0.20  | 0.02  | 0.04  | 0.00  | -0.01 | 0.04  |
| cg02681842 | <i>PLEC1</i>    | 0.23  | 0.01  | 0.02  | -0.03 | -0.02 | 0.06  |
| cg01023808 | <i>TECPR1</i>   | 0.23  | 0.01  | 0.02  | 0.00  | 0.00  | 0.01  |
| cg13707793 | <i>CXXC5</i>    | 0.27  | 0.04  | 0.02  | 0.10  | 0.00  | 0.04  |
| cg03723716 | <i>PPP2R1B</i>  | 0.29  | 0.08  | 0.05  | 0.13  | 0.02  | 0.14  |
| cg15555527 | <i>ANTXR2</i>   | 0.36  | NA    | NA    | NA    | NA    | NA    |
